# Supplementary material
Source: MDPI journal article supplement (https://www.mdpi.com/2076-3417/12/10/5088)
Supplement: s1 [file s1 › applsci-1714563-supplementary.pdf]

# Modelling Soil Temperature by Tree-Based Machine Learning Methods in Different Climatic Regions of China

Jianhua Dong <sup>1</sup>, Guomin Huang <sup>1</sup>, Lifeng Wu <sup>1,2,\*</sup>, Fa Liu <sup>3</sup>, Sien Li <sup>4</sup>, Yaokui Cui <sup>5</sup>, Yicheng Wang <sup>2</sup>, Menghui Leng <sup>6</sup>  
Jie Wu <sup>7</sup> and Shaofei Wu <sup>1</sup>

<sup>1</sup> School of Hydraulic and Ecological Engineering, Nanchang Institute of Technology, Nanchang 330099, China; djh0530dyz@whu.edu.cn (J.D.); g.huang@nit.edu.cn (G.H.); wsf17@nit.edu.cn (S.W.)

<sup>2</sup> State Key Laboratory of Simulation and Regulation of Water Cycle in River Basin, China Institute of Water Resources and Hydropower Research, Beijing 100038, China; wangych@iwhr.com

<sup>3</sup> Key Laboratory of Water Cycle and Related Land Surface Processes, Institute of Geographic Science and Science and Natural Resources Research, Chinese Academy of Sciences, Beijing 100101, China; liufa@igsrr.ac.cn

<sup>4</sup> Center for Agricultural Water Research in China, China Agricultural University, Beijing 100083, China; lisien@cau.edu.cn

<sup>5</sup> Institute of RS and GIS, School of Earth and Space Sciences, Peking University, Beijing 100871, China; yaokuicui@pku.edu.cn

<sup>6</sup> Jiangxi Key Laboratory of Hydrology-Water Resources and Water Environment, Nanchang Institute of Technology, Nanchang 330099, China; 18279130275@163.com

<sup>7</sup> School of Civil Engineering and Architecture, Wuhan Polytechnic University, Wuhan 430023, China; wujiemc@whpu.edu.cn

\* Correspondence: wulifeng@nit.edu.cn

## Figures

**Figure S1.** Performance of data-driven models (M5P2: **a, b**; RF2: **c, d**; XGBoost2: **e, f**) for the estimation of  $T_s$  with  $T_{\text{mean}}$  as inputs.

**Figure S2.** Performance of data-driven models (M5P3: **a, b**; RF3: **c, d**; XGBoost3: **e, f**) for the estimation of  $T_s$  with  $T_{\text{mean}}$  and RH as inputs.

**Figure S3.** Performance of data-driven models (M5P4: **a, b**; RF4: **c, d**; XGBoost4: **e, f**) for the estimation of  $T_s$  with  $T_{\text{mean}}$  and  $R_s$  as inputs.

**Figure S4.** Performance of data-driven models (M5P5: **a, b**; RF5: **c, d**; XGBoost5: **e, f**) for the estimation of  $T_s$  with  $T_{\text{max}}$  and  $T_{\text{min}}$  as inputs.

**Figure S5.** Performance of data-driven models (M5P6: **a, b**; RF6: **c, d**; XGBoost6: **e, f**) for the estimation of  $T_s$  with  $T_{\text{mean}}$  and  $U_2$  as inputs.

**Figure S6.** Scatter plot of estimated  $T_s$  versus measured  $T_s$  from the three machine learning models with  $T_{\text{max}}$  and  $T_{\text{min}}$  as inputs.

**Figure S7.** Scatter plot of estimated  $T_s$  versus measured  $T_s$  from the three machine learning models with  $T_{\text{mean}}$  and  $U_2$  as inputs.

**Figure S8.** Combined indicator values for each model at all stations in the IM region.

**Figure S9.** Combined indicator values for each model at all stations in the NEC region.

**Figure S10.** Combined indicator values for each model at all stations in the NC region.

**Figure S11.** Combined indicator values for each model at all stations in the CC region.

**Figure S12.** Combined indicator values for each model at all stations in the SC region.

**Figure S13.** Combined indicator values for each model at all stations in the QTP region.

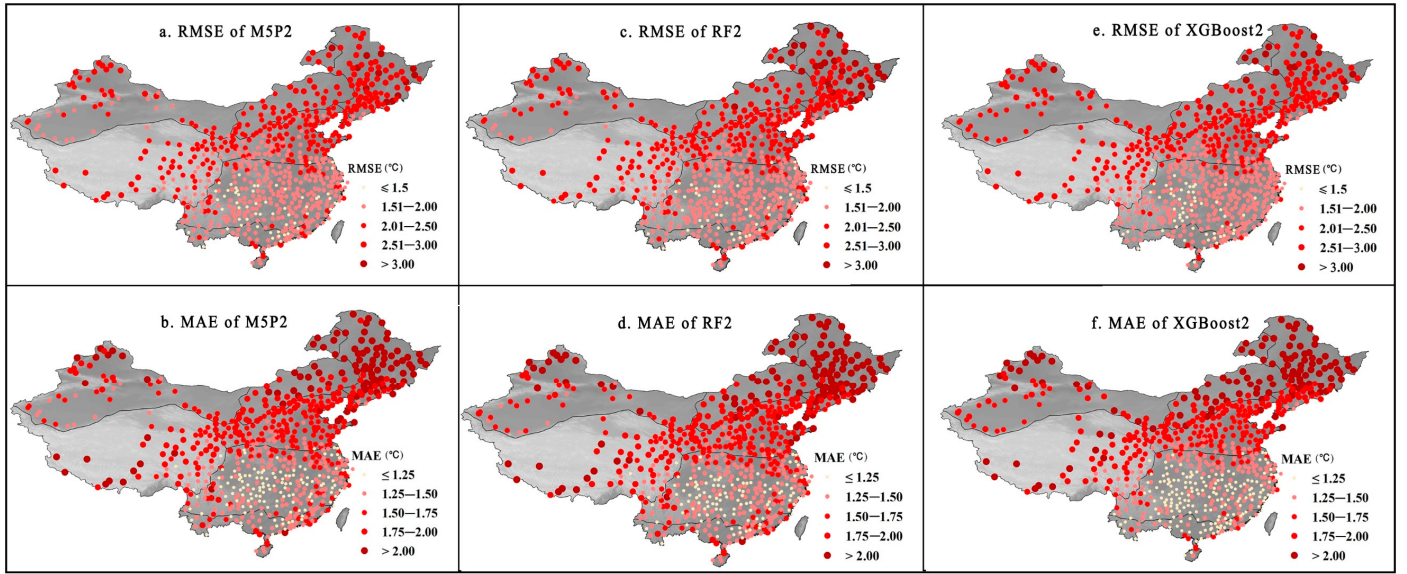

**Figure S1.** Performance of data-driven models (M5P2: **a, b**; RF2: **c, d**; XGBoost2: **e, f**) for the estimation of  $T_s$  with  $T_{mean}$  as inputs.

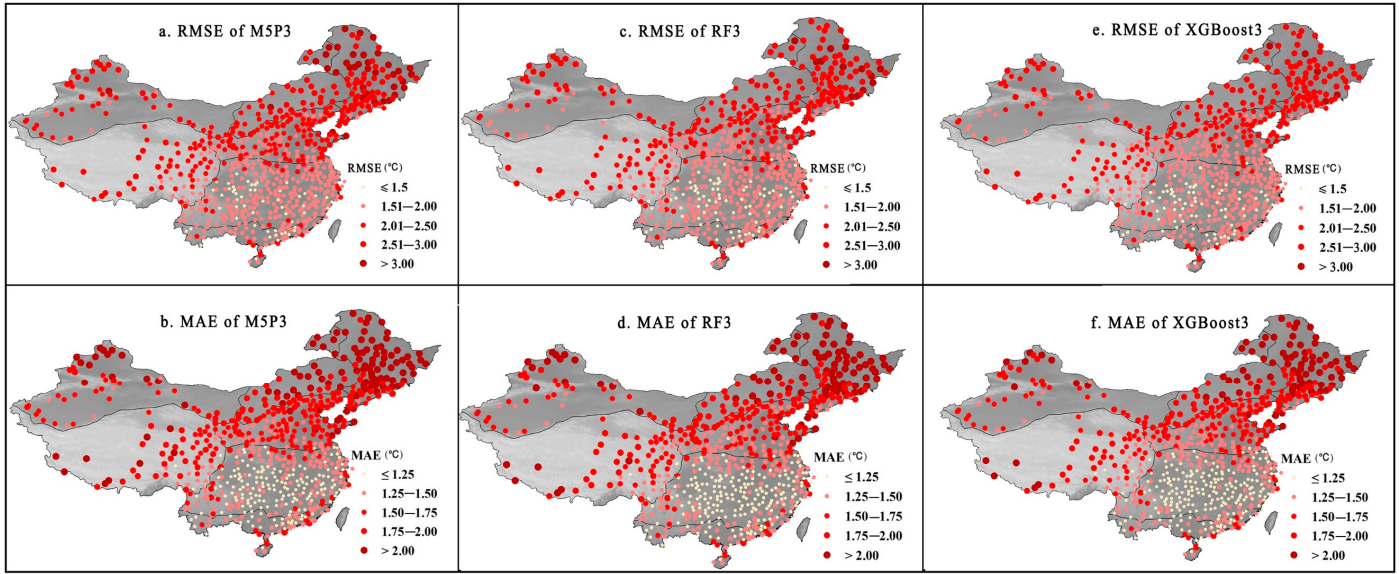

**Figure S2.** Performance of data-driven models (M5P3: **a, b**; RF3: **c, d**; XGBoost3: **e, f**) for the estimation of  $T_s$  with  $T_{mean}$  and RH as inputs.

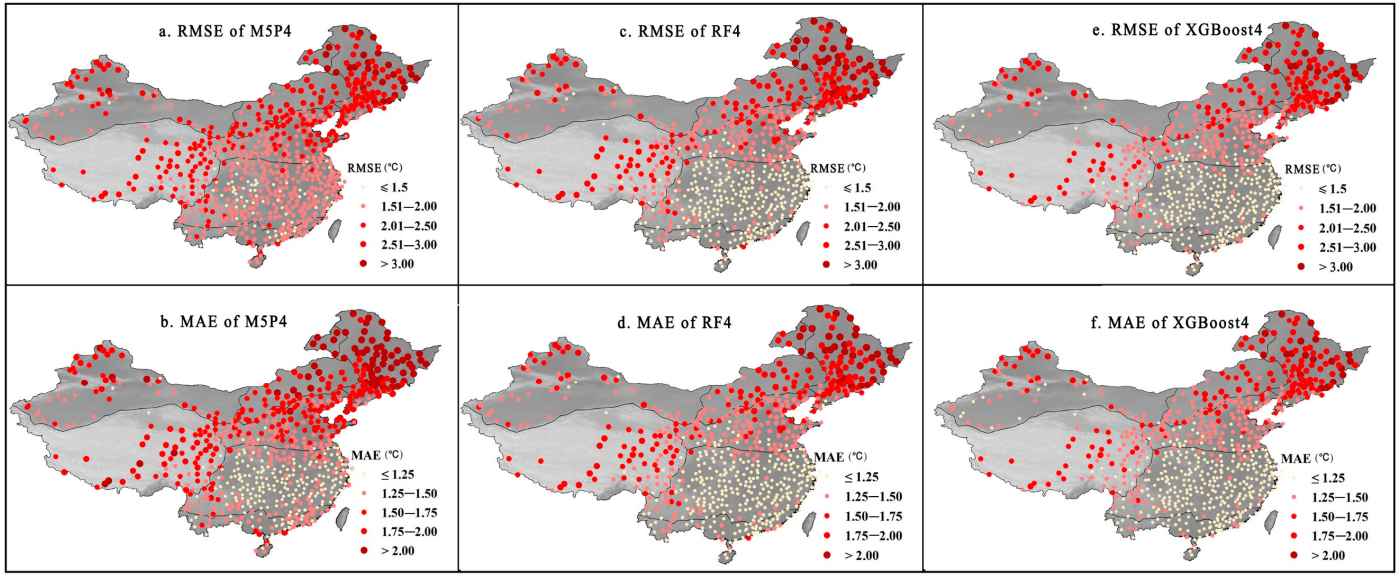

**Figure S3.** Performance of data-driven models (M5P4: **a**, **b**; RF4: **c**, **d**; XGBoost4: **e**, **f**) for the estimation of  $T_s$  with  $T_{mean}$  and  $R_s$  as inputs.

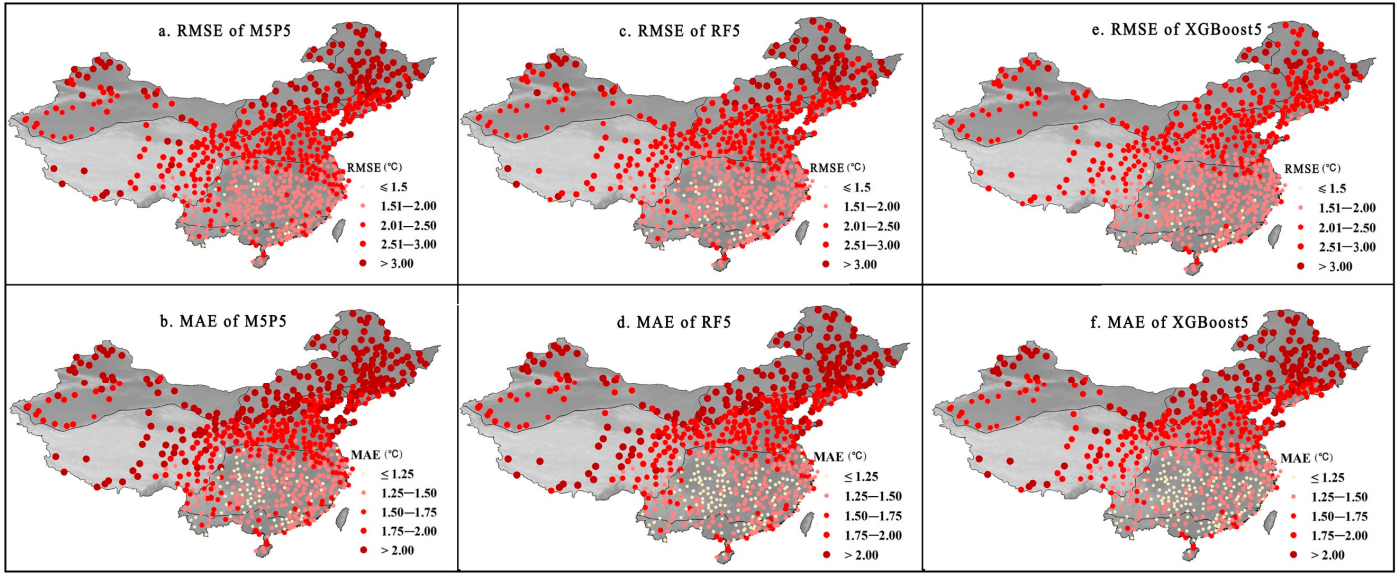

**Figure S4.** Performance of data-driven models (M5P5: **a**, **b**; RF5: **c**, **d**; XGBoost5: **e**, **f**) for the estimation of  $T_s$  with  $T_{max}$  and  $T_{min}$  as inputs.

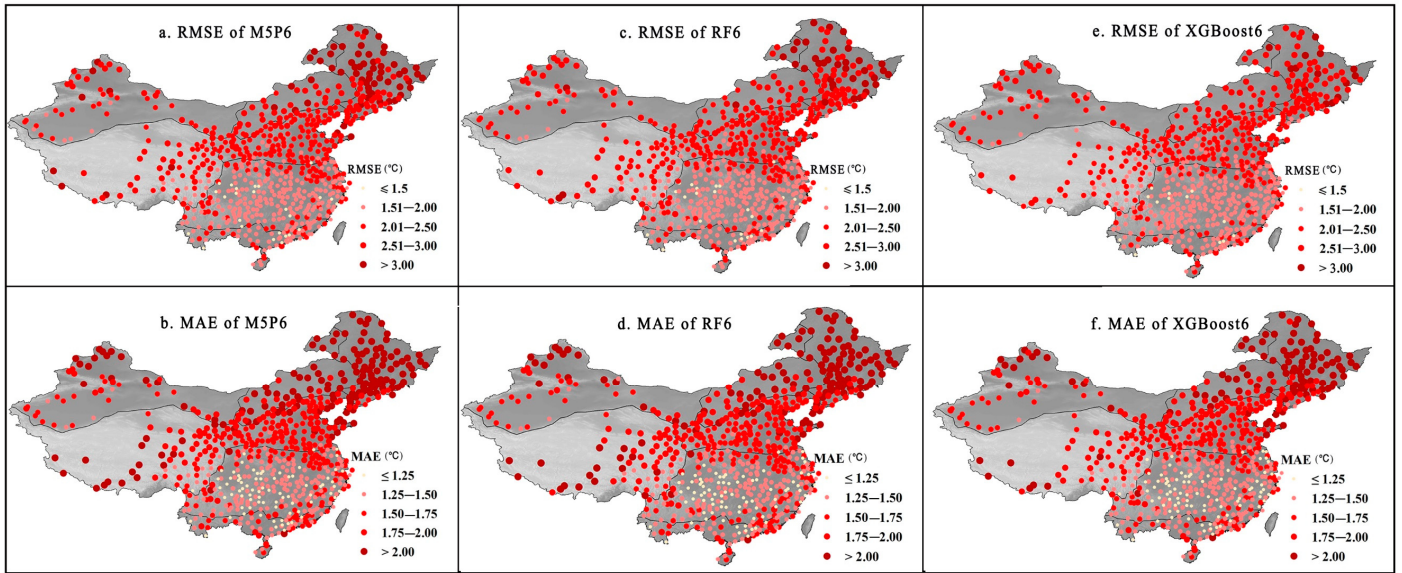

**Figure S5.** Performance of data-driven models (M5P6: **a, b**; RF6: **c, d**; XGBoost6: **e, f**) for the estimation of  $T_s$  with  $T_{mean}$  and  $U_2$  as inputs.

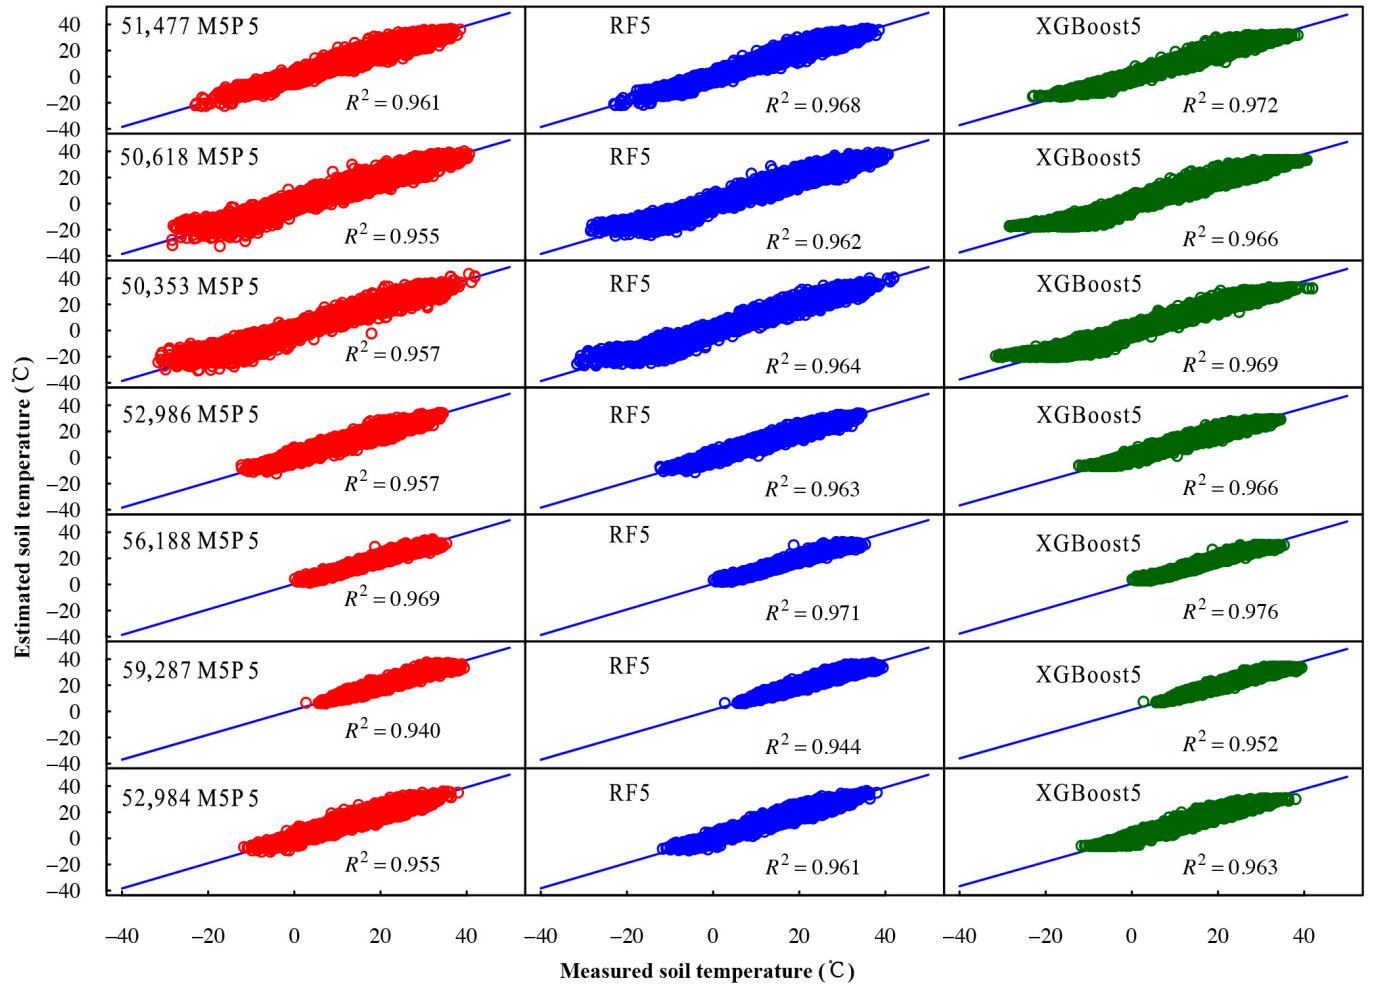

**Figure S6.** Scatter plot of estimated  $T_s$  versus measured  $T_s$  from the three machine learning models with  $T_{\max}$  and  $T_{\min}$  as inputs.

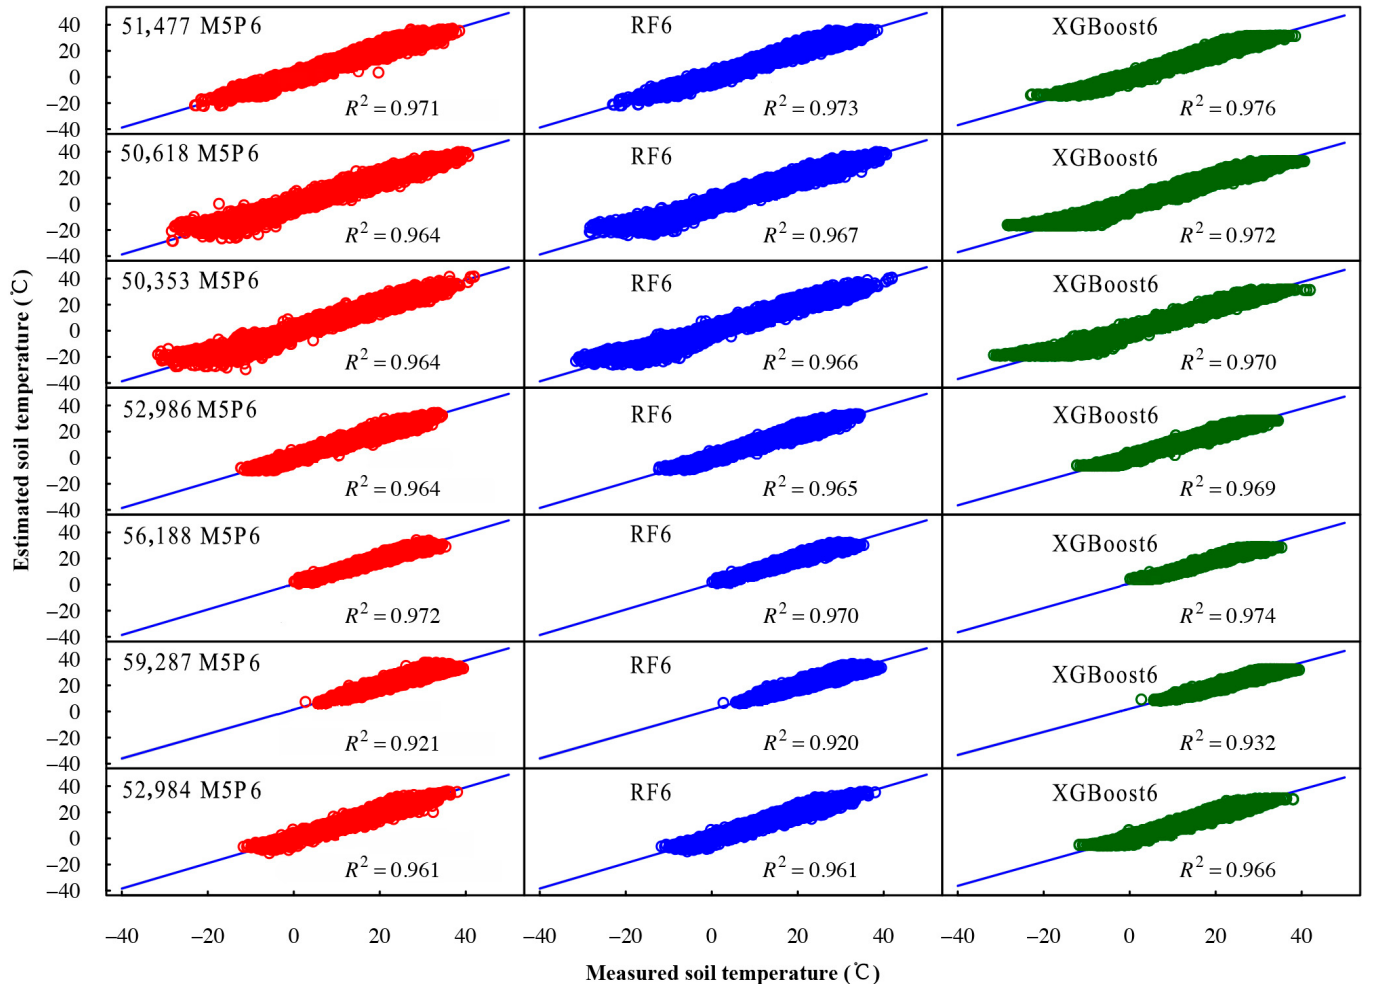

**Figure S7.** Scatter plot of estimated  $T_s$  versus measured  $T_s$  from the three machine learning models with  $T_{\text{mean}}$  and  $U_2$  as inputs.

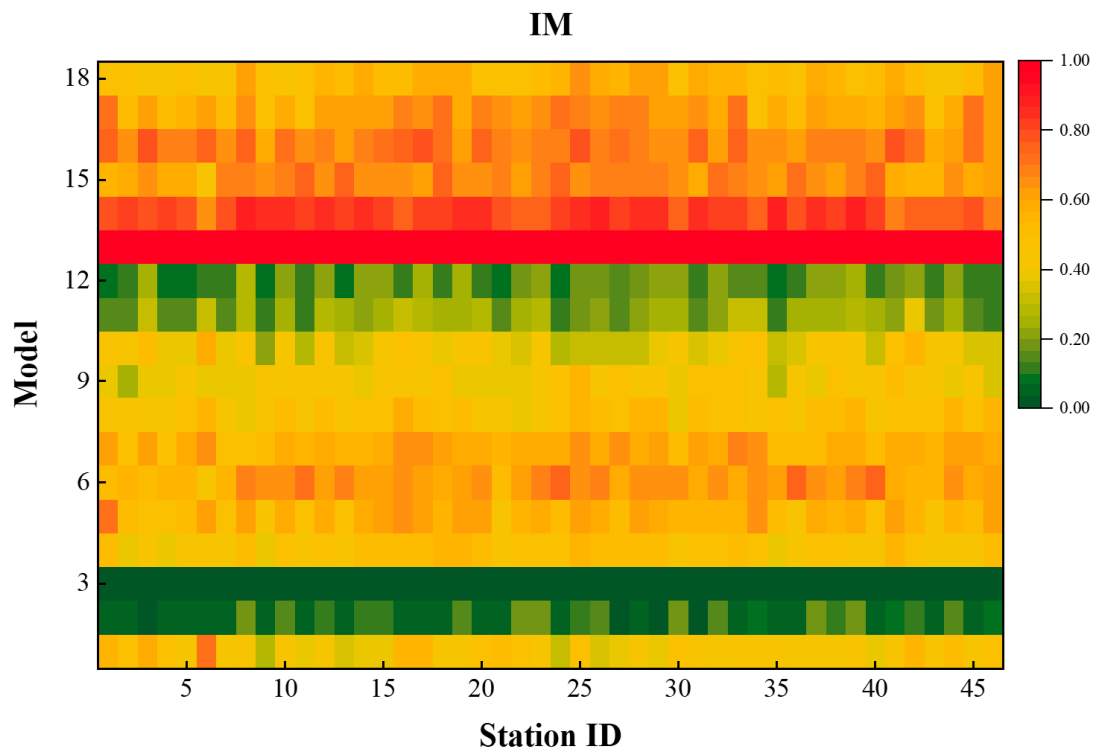

**Figure S8.** Combined indicator values for each model at all stations in the IM region.

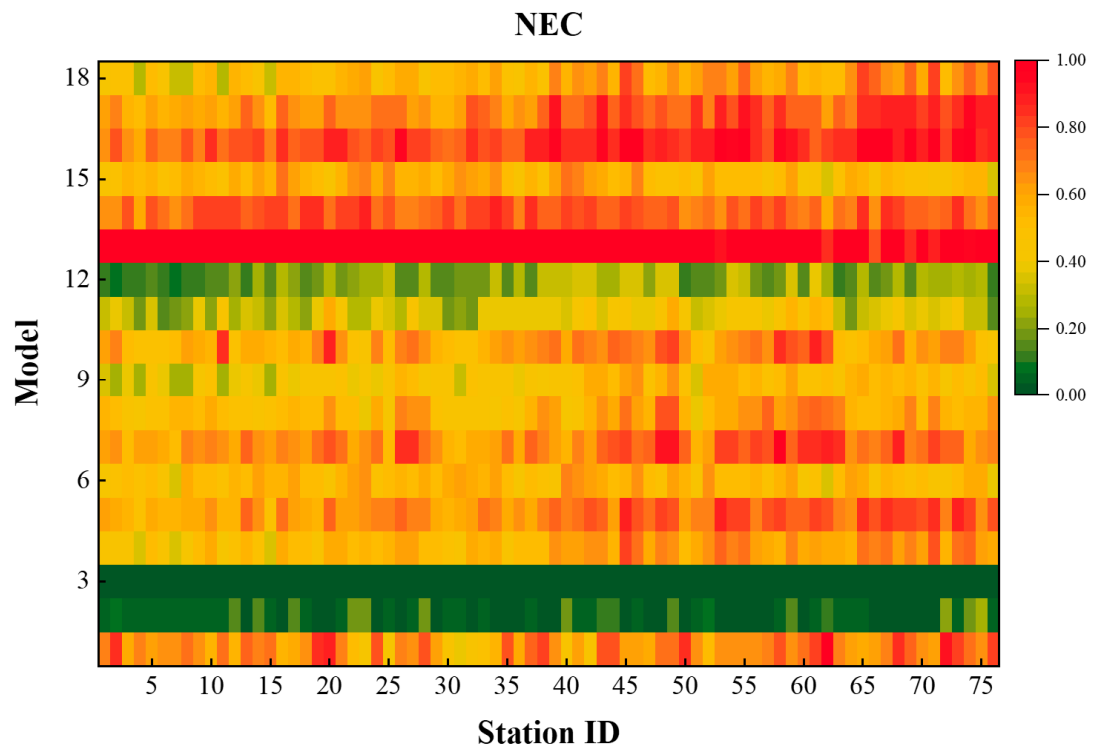

**Figure S9.** Combined indicator values for each model at all stations in the NEC region.

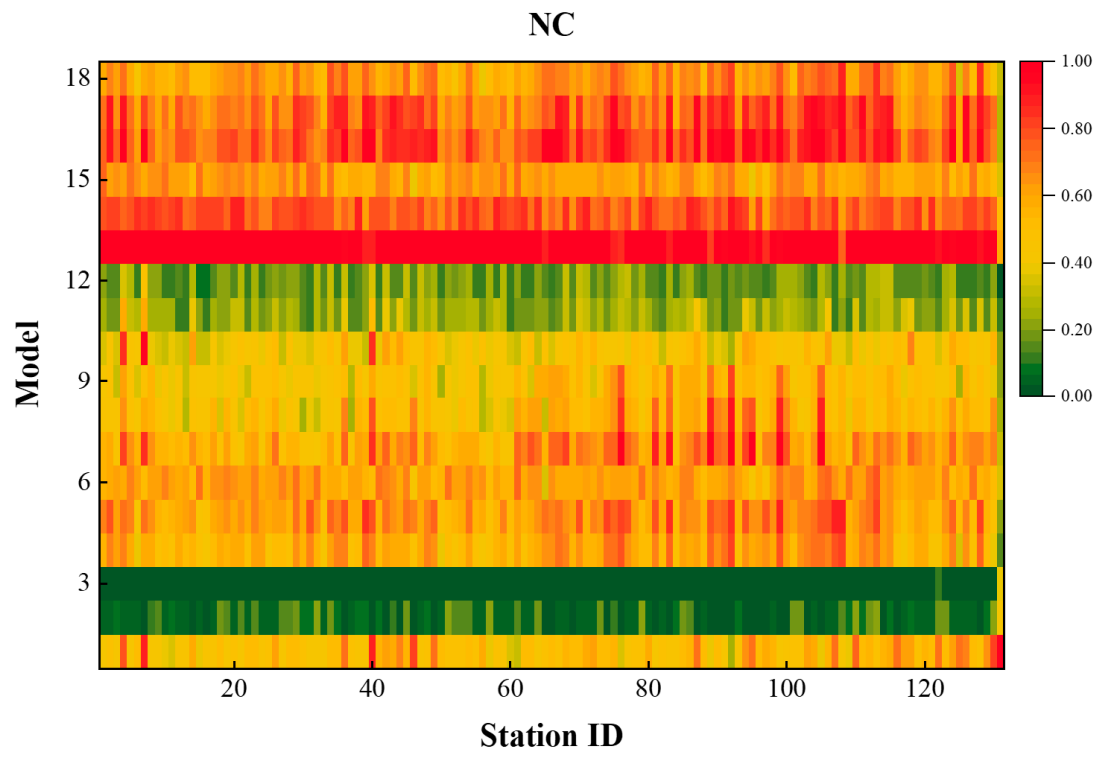

**Figure S10.** Combined indicator values for each model at all stations in the NC region.

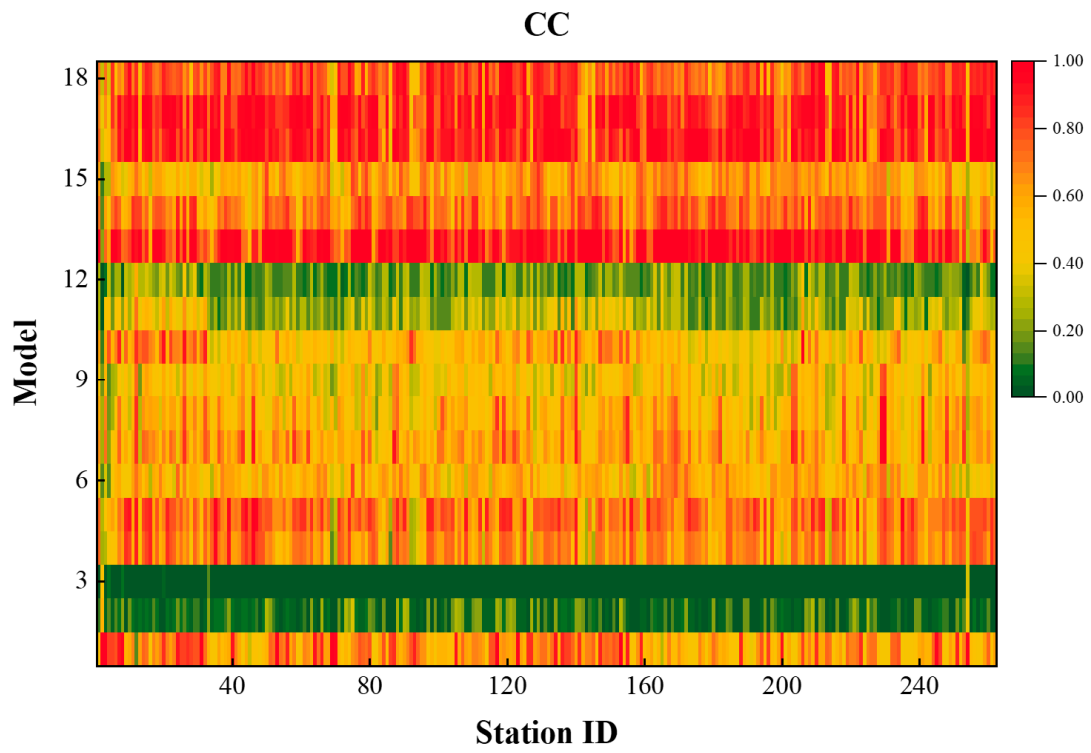

**Figure S11.** Combined indicator values for each model at all stations in the CC region.

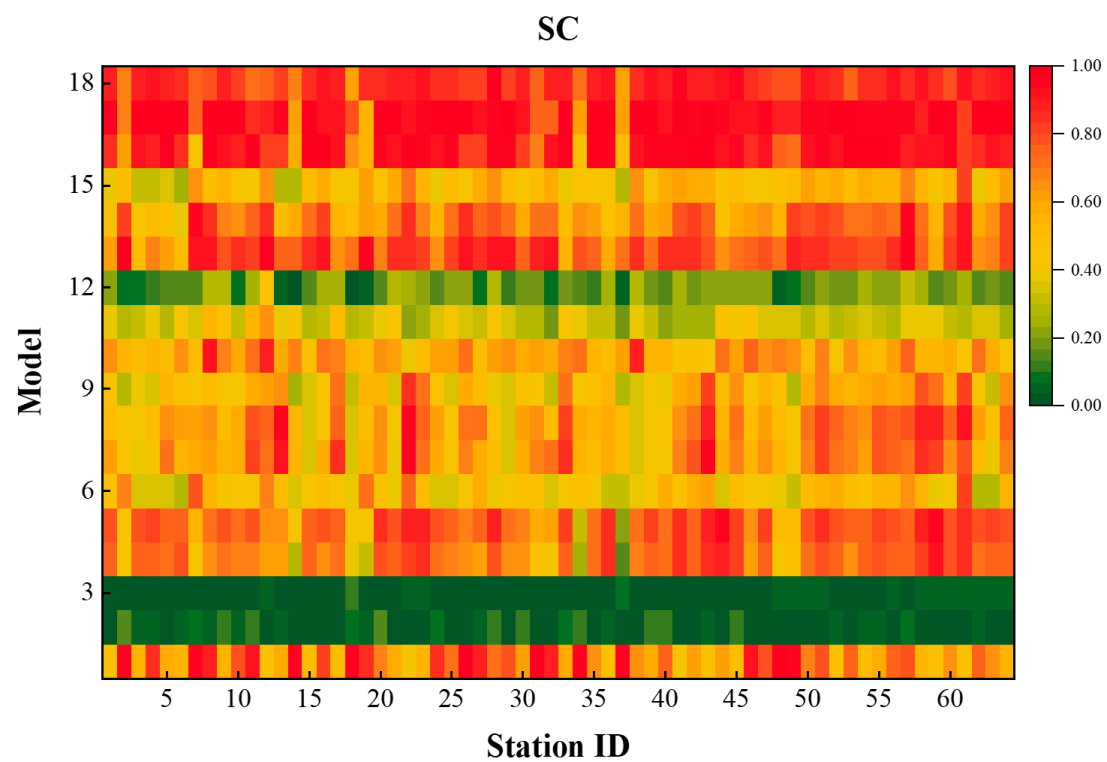

**Figure S12.** Combined indicator values for each model at all stations in the SC region.

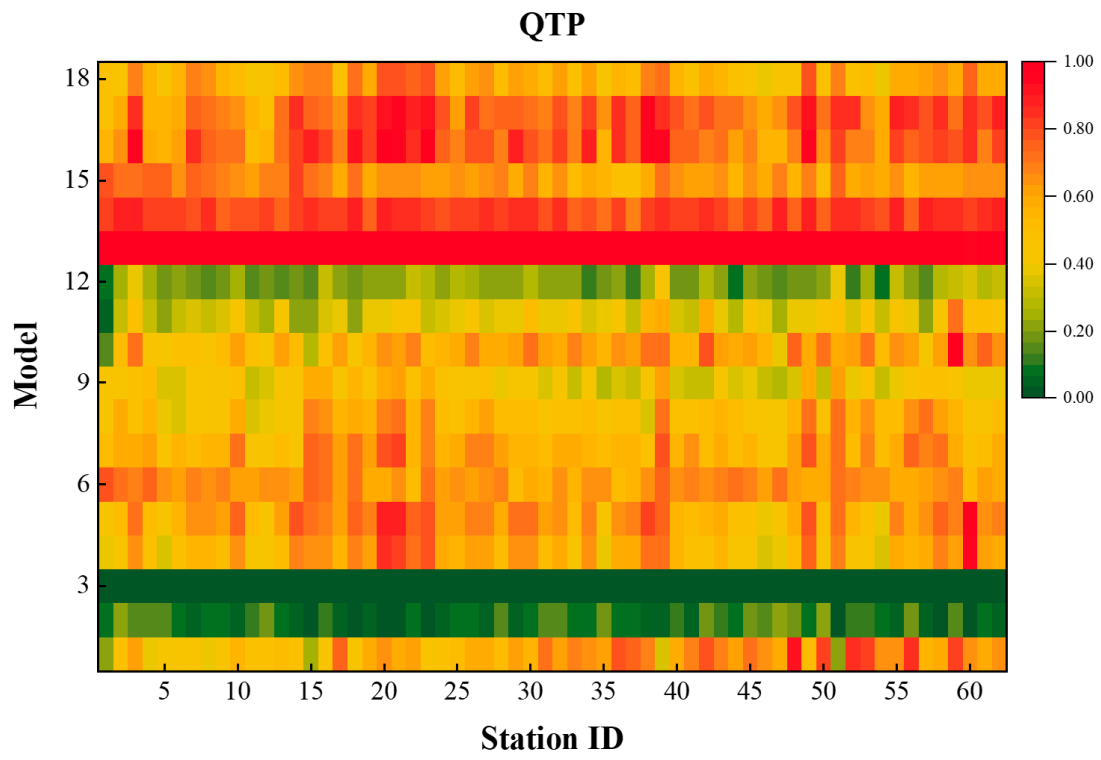

**Figure S13.** Combined indicator values for each model at all stations in the QTP region.
